# Supplementary material for: Inferring differentiation pathways from gene expression
Source: PubMed Central journal article supplement — Bioinformatics. 2008 Jul 1;24(13):i156–64. doi: 10.1093/bioinformatics/btn153 (PMC2718631; doi:10.1093/bioinformatics/btn153), 2008-07-01
Supplement: btn153_1.pdf [file btn153_1.pdf]

## Comparirson of GO Enrichment

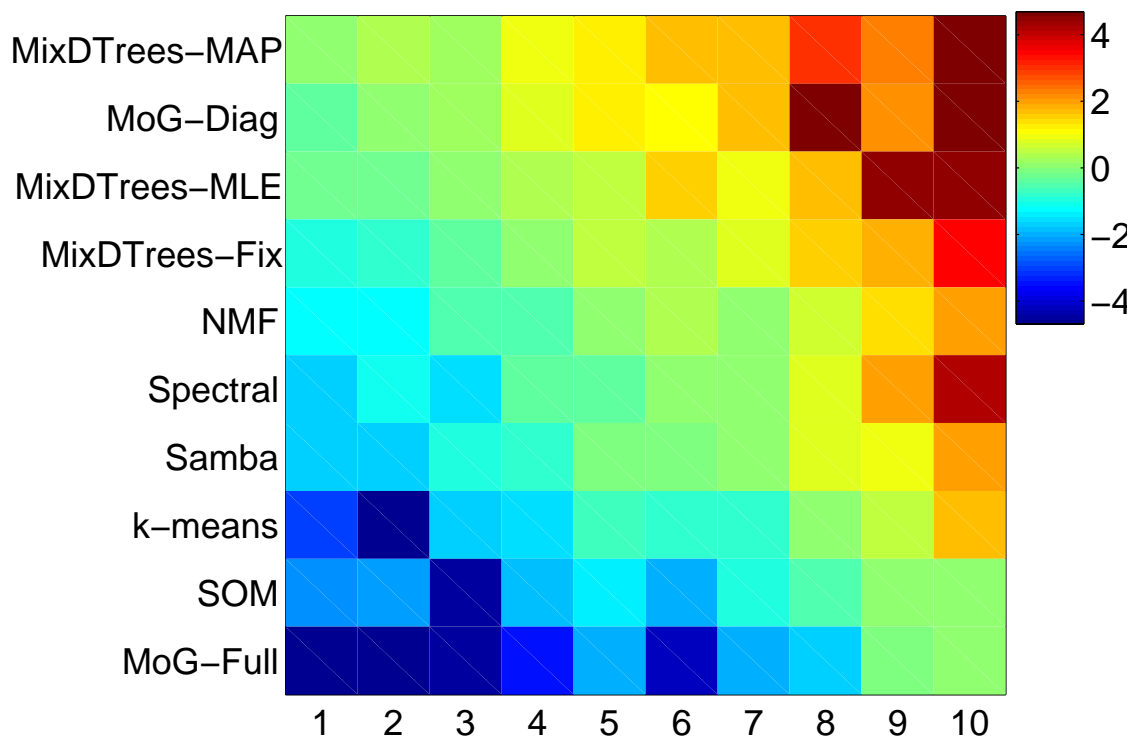

Figure 1: Heat-map plot displaying the comparison of GO enrichment for 10 distinct clustering methods. More precisely, entries in the plot correspond to  $\log(\#\{p\text{-value } m_y < p\text{-value } m_x\} / \#\{p\text{-value } m_y > p\text{-value } m_x\})$ , where red (or blue) values indicate that the method on the  $y$ -axis ( $m_y$ ) had a higher (or lower) count of enriched GO term than the method on the  $x$ -axis ( $m_x$ ); numbers on the  $x$ -axis correspond to the methods in the  $y$ -axis.
